# Supplementary material for: The Relationship between Sense of Presence, Emotional Response, and Clinical Outcomes in Virtual Reality-Based Therapy for Treatment-Resistant Schizophrenia: A Correlational Study
Source: Preprints.org preprint supplement (doi:10.20944/preprints202405.0198.v1), 2024-05-06
Supplement: Supplementary file 1 [file supplementary]

**Supplementary tables**

Note: Variation percentages were calculated using baseline PSYRATS—AH scores and 3-month follow-up PSYRATS—AH scores, or when 3-month follow-up PSYRATS—AH scores were not available, post-therapy PSYRATS—AH scores were used. A negative result of PSYRATS—AH variation percentage indicated a reduction in the severity of auditory hallucinations.

**Table S1.** Correlations between the variation percentages of PSYRATS – AH subscales’ scores and sense of presence evaluated with the GRS and the IPQ.

|  | **GRS mean scores (N=60)** | **IPQ mean scores (N=33)** |
| --- | --- | --- |
| **PSYRATS – AH subscales** | rs | rs |
| Attribution | -0.138 | -0.095 |
| Distress | -0.310* | 0.047 |
| Frequency | 0.225 | -0.331 |
| Loudness | -0.285* | -0.402* |

GRS: graphic rating scale; IPQ: Igroup Presence Questionnaire; PSYRATS—AH: Psychotic Symptom Rating Scales – Auditory Hallucinations; N: sample size; rs: Spearman correlation coefficient.

**p < 0.01

*p <0.05

**Table S2.** Correlations between the variation percentages of PSYRATS—AH subscales’ scores and emotions.

|  |  | **PSYRATS**—**AH**  **Attribution** | **PSYRATS**—**AH**  **Distress** | **PSYRATS**—**AH**  **Frequency** | **PSYRATS**—**AH**  **Loudness** |
| --- | --- | --- | --- | --- | --- |
| **Mean emotional response** | **N** | rs | rs | rs | rs |
| Sadness | 18 | -0.272 | 0.051 | -0.241 | 0.289 |
| Anger | 60 | -0.088 | -0.044 | -0.290* | 0.153 |
| Anxiety | 60 | -0.085 | 0.107 | -0.343** | -0.017 |
| Control | 60 | 0.041 | -0.216 | -0.003 | -0.109 |
| Fear | 60 | -0.065 | 0.198 | -0.233 | -0.080 |
| Serenity | 60 | 0.191 | -0.115 | 0.097 | -0.092 |
| Maximum of negative emotions | 60 | -0.092 | 0.116 | -0.314* | 0.028 |

PSYRATS—AH: Psychotic Symptom Rating Scales – Auditory Hallucinations; N: sample size; rs: Spearman correlation coefficient.

**p < 0.01

*p <0.05
